# Supplementary material for: Facile synthesis of nanostructured Li4Ti5O12/PEDOT:PSS composite as anode material for lithium-ion batteries
Source: Royal Society of Chemistry journal article supplement (doi:10.1039/c6ra20958k), 2016-01-01
Supplement: c6ra20958k1.pdf [file c6ra20958k1.pdf]

Electronic Supplementary Material (ESI) for RSC Advances.  
This journal is © The Royal Society of Chemistry 2016

Electronic Supplementary Information

**Facial synthesis of nanostructured  $\text{Li}_4\text{Ti}_5\text{O}_{12}$ /  
PEDOT:PSS composite as anode material for lithium-ion  
batteries**

Yan Liu,<sup>ab</sup> Daoping Tang,<sup>a</sup> Haoxiang Zhong,<sup>a</sup> Qianyu Zhang,<sup>a</sup> Jianwen Yang<sup>c</sup> and  
Lingzhi Zhang<sup>\*a</sup>

<sup>a</sup> Key Laboratory of Renewable Energy, Guangdong Key Laboratory of New and Renewable Energy Research and Development, Guangzhou Institute of Energy Conversion, Chinese Academy of Sciences, No.2 Nengyuan Rd., Guangzhou 510640, China.

<sup>b</sup> University of Chinese Academy of Sciences, 19(A) Yu Quan Road, Beijing, 100049, China.

<sup>c</sup> College of Chemistry and Bioengineering, Guilin University of Technology, 12 Jiangan Road, Guilin, Guangxi, 541004, China.

Corresponding author:

Tel.: +86-20-37246025; Fax: +86-20-37246026.

E-mail address: lzzhang@ms.giec.ac.cn(L.Z. Zhang)

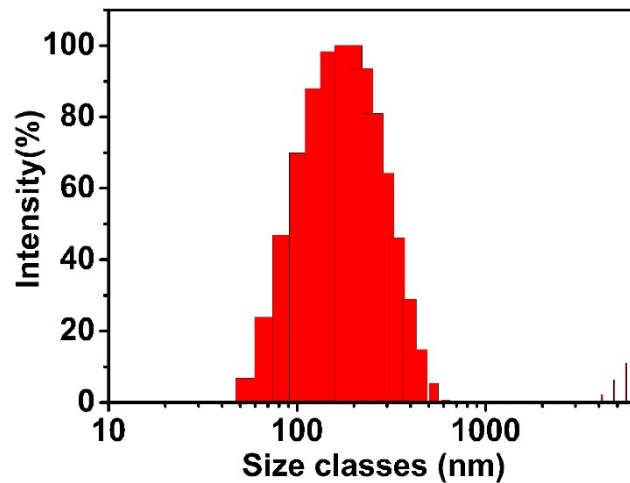

**Fig. S1** Particle size distribution of LTO/PP.

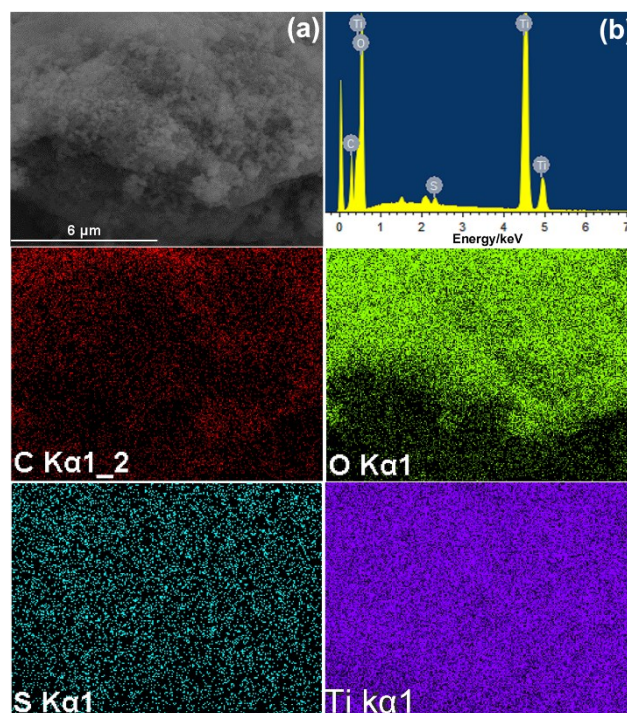

**Fig. S2** EDS elemental mapping (C, O, S and Ti) for the selected area (a) of LTO/PP;  
(b) EDS spectrum of the surface of LTO/PP.
